# Supplementary material
Source: ML conference proceedings conference paper supplement (https://openaccess.thecvf.com/content/ICCV2023/html/Ye_FeatureNeRF_Learning_Generalizable_ICCV_2023_paper.html)
Supplement: Supplementary file 1 [file Ye_FeatureNeRF_Learning_Generalizable_ICCV_2023_supplemental.zip]

# Supplementary Material for FeatureNeRF: Learning Generalizable NeRFs by Distilling Pre-trained Vision Foundation Models

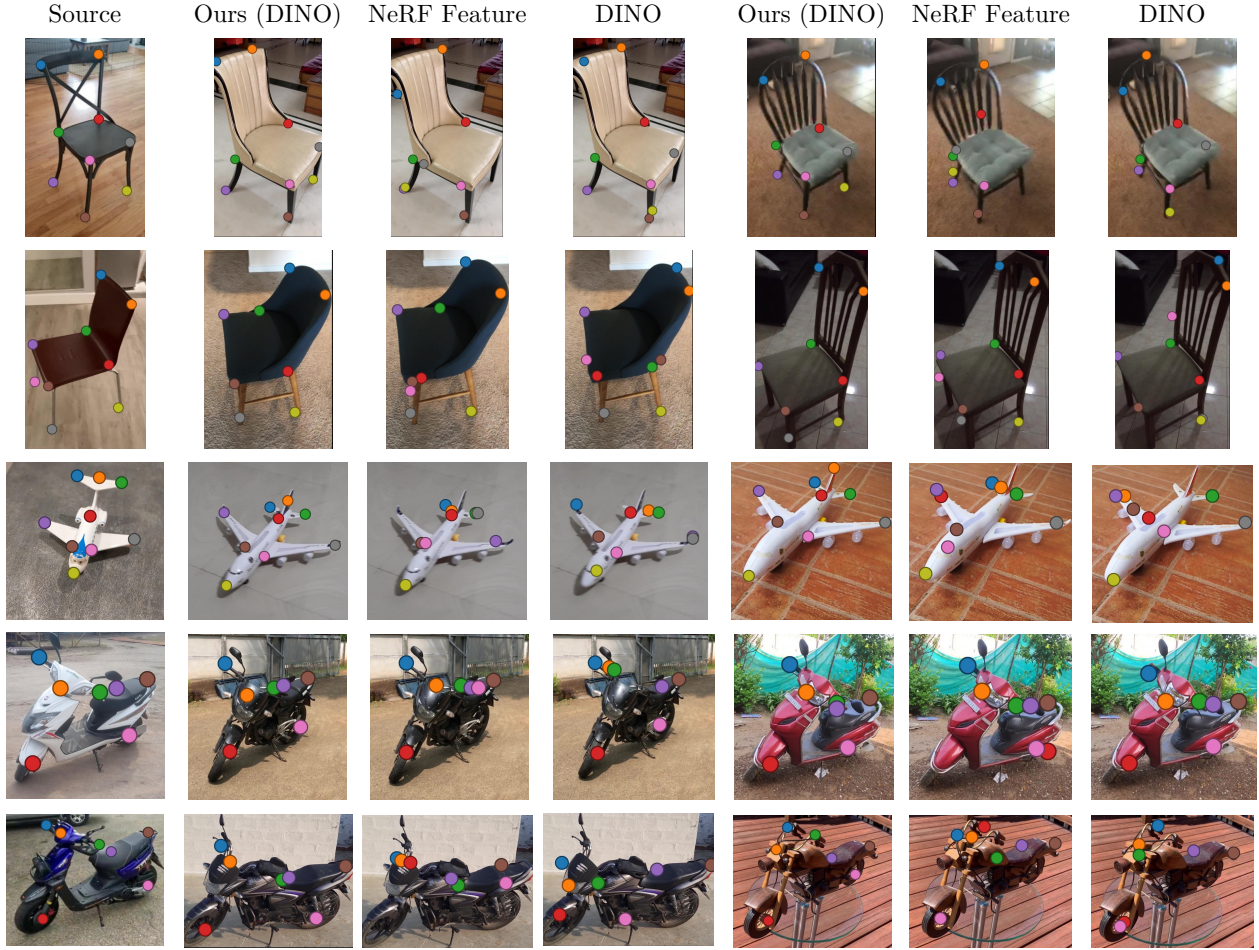

Figure 1: Keypoints transfer on CO3D.

In this supplementary material, we present additional qualitative results for CO3D keypoint transfer in Fig 1, cross-instance part co-segmentation in Fig 2 and Fig 3, and cross-instance keypoint transfer in Fig 5 and Fig 4. Please see our **video** for an overview of our work.

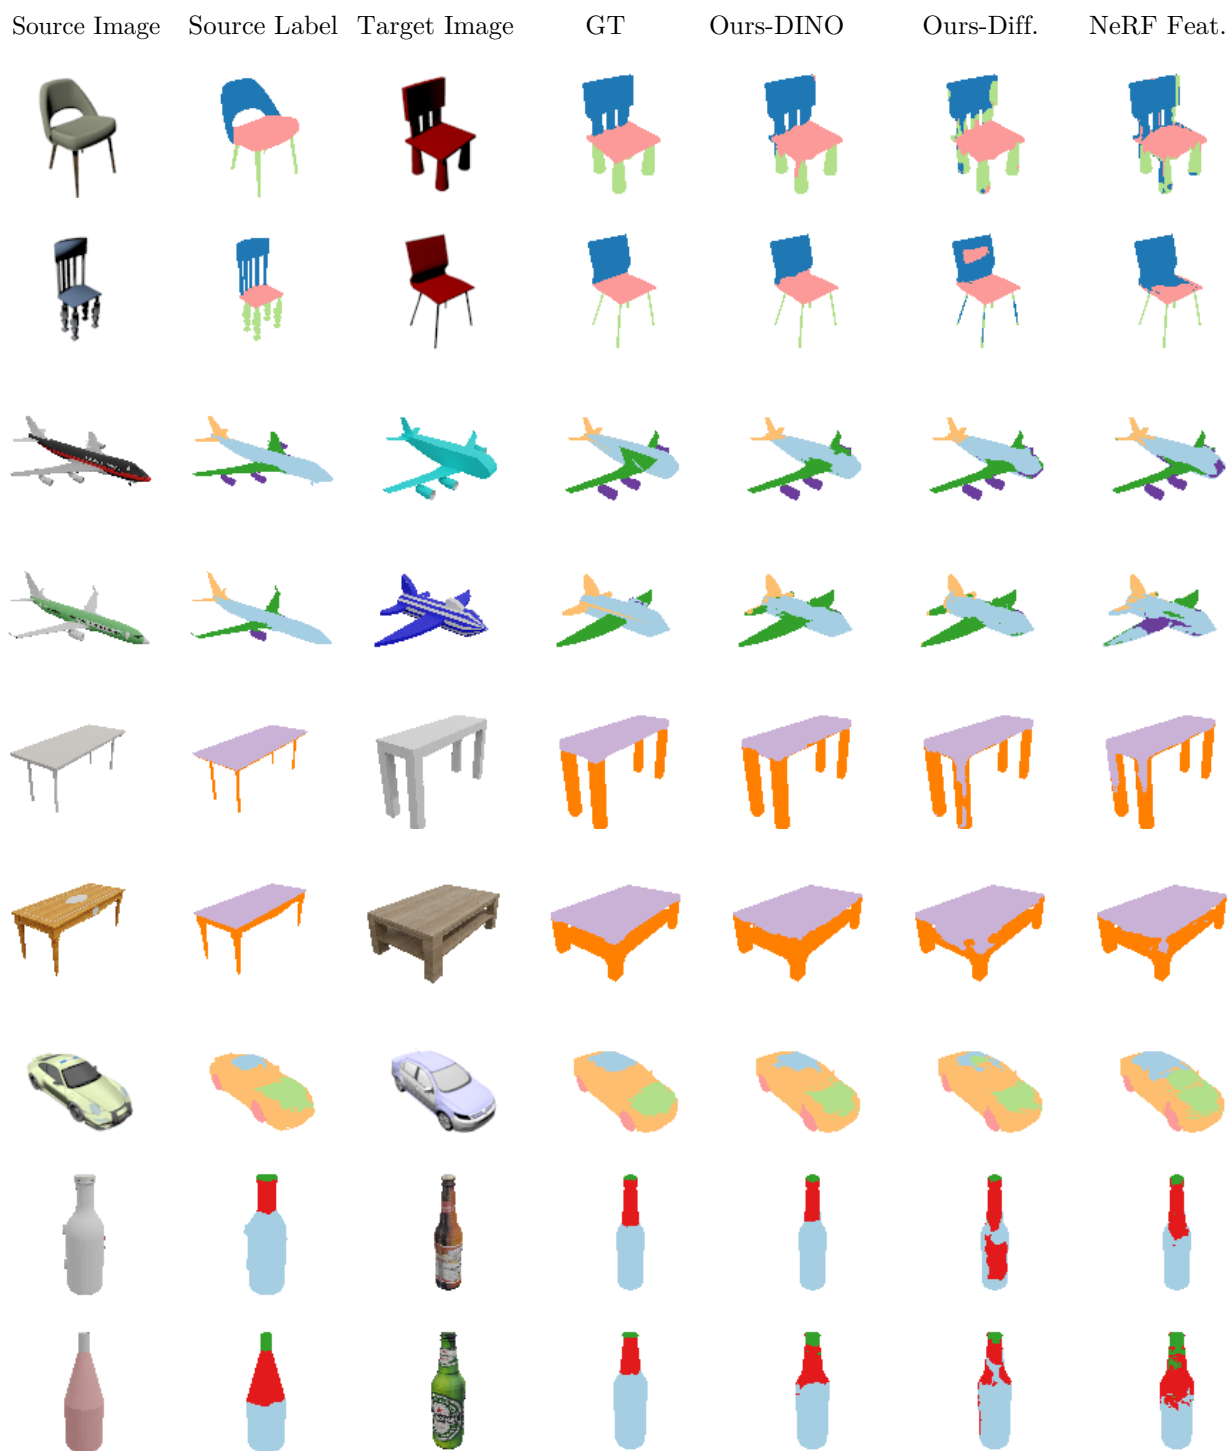

Figure 2: Qualitative results for cross-instance part co-segmentation.

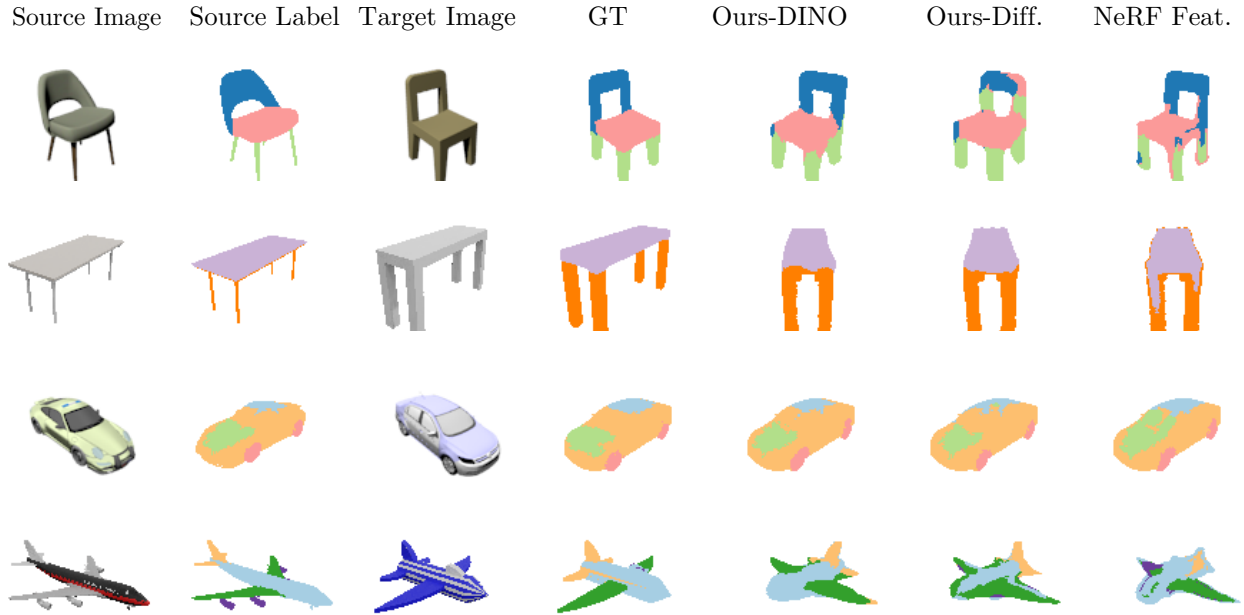

Figure 3: **Qualitative results for novel-view cross-instance part co-segmentation.**

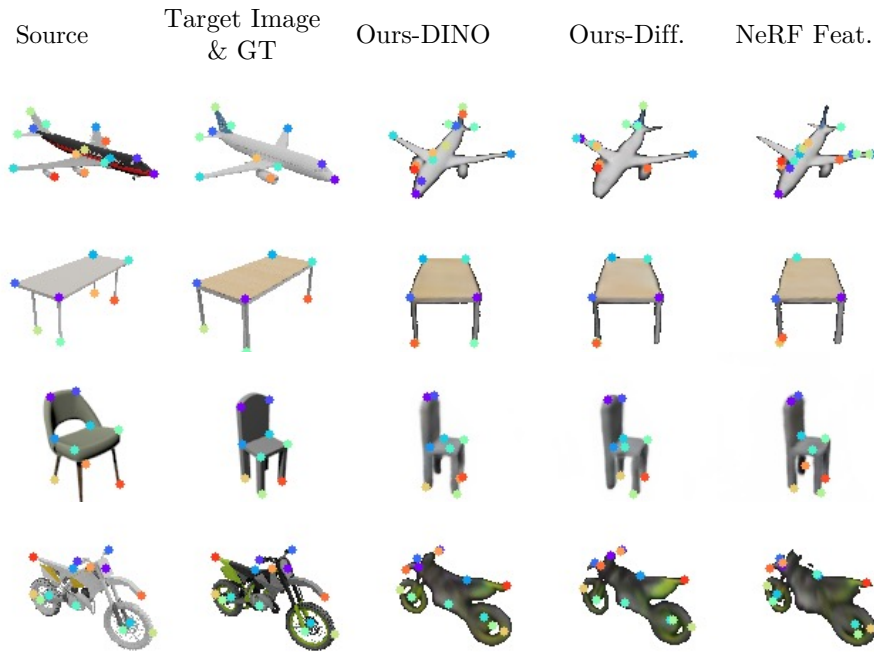

Figure 4: **Qualitative results for novel-view cross-instance keypoints transfer.**

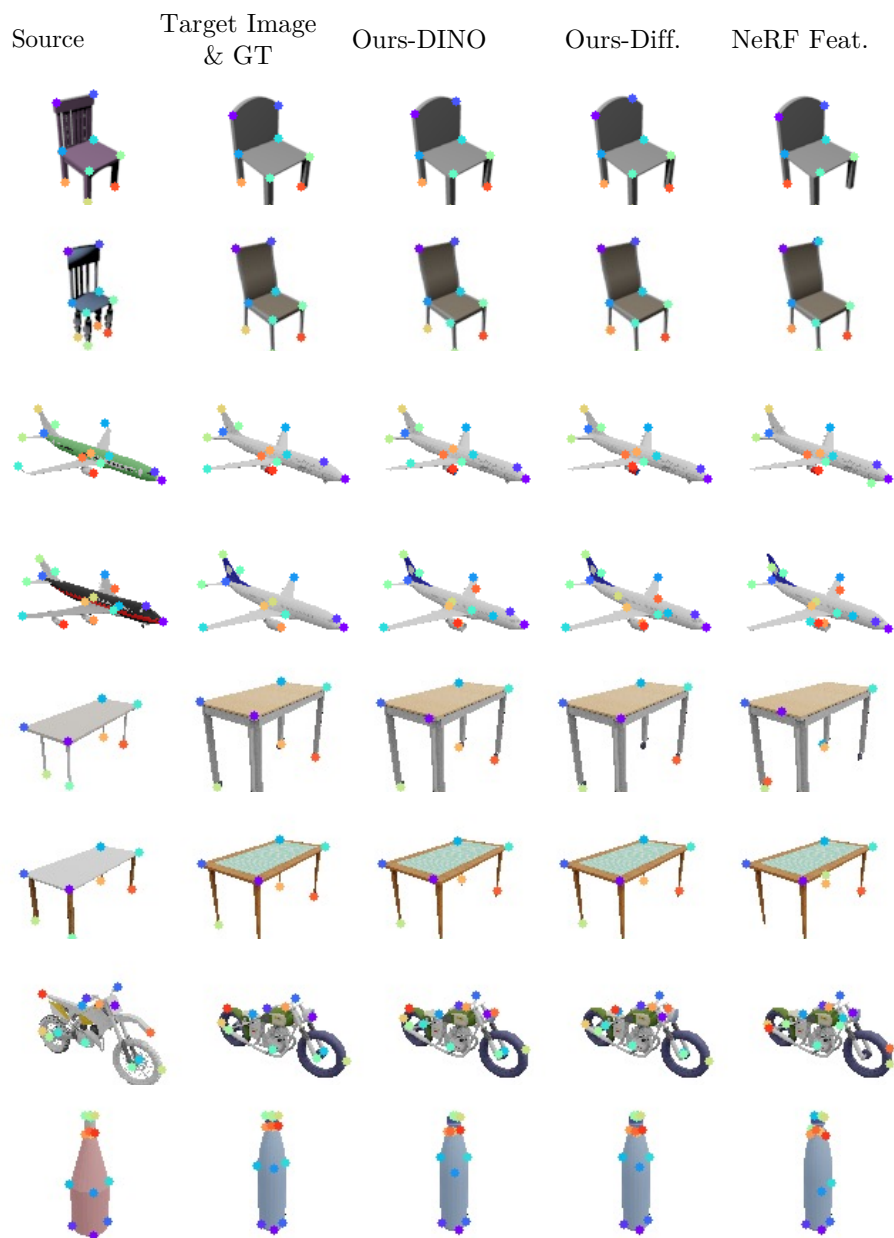

Figure 5: Qualitative results for cross-instance keypoints transfer.
